# Supplementary material for: Prediction of base editor off-targets by deep learning
Source: PubMed Central journal article supplement (PMC10475126; doi:10.1038/s41467-023-41004-3), 2023-09-02
Supplement: 41467_2023_41004_MOESM18_ESM.pdf [file 41467_2023_41004_MOESM18_ESM.pdf]

**Title: Supplementary Data 1.**

**Description:** The efficiency dataset of mutation targets for ABE

**Title: Supplementary Data 2.**

**Description:** The efficiency dataset of mutation targets for CBE.

**Title: Supplementary Data 3.**

**Description:** The GC content of ABE library.

**Title: Supplementary Data 4.**

**Description:** The GC content of CBE library.

**Title: Supplementary Data 5.**

**Description:** The independent t-test pvalue (bonferroni correction) across position in ABE.

**Title: Supplementary Data 6.**

**Description:** The independent t-test pvalue (bonferroni correction) across position in CBE

**Title: Supplementary Data 7.**

**Description:** The benchmark results of various models for ABE

**Title: Supplementary Data 8.**

**Description:** The third-party off target datasets of ABE (endogenous)

**Title: Supplementary Data 9.**

**Description:** The benchmark results of various models for CBE

**Title: Supplementary Data 10.**

**Description:** The third-party off target datasets of CBE (endogenous)

**Supplementary Data 11.** The third-party off target datasets of ABE (in vitro)

**Supplementary Data 12.** The third-party off target datasets of CBE (in vitro)

**Supplementary Data 13.** The sequences of oligonucleotides

**Supplementary Data 14.** The hyperparameters used for Tree-structured Parzen Estimator
